## Books Reviews · Buchbesprechungen · Livres nouveaux

---

F. REUBI: **Nierenkrankheiten**. 2., veränderte und vollständig neu bearbeitete Auflage. Hans Huber, Bern 1970. 709 pp., 168 fig., 63 tab., SFr. 98.–.

Der Titel des Buches lautet: Nierenkrankheiten, ein Lehrbuch für Studenten, Assistenten, Internisten, Urologen und praktische Ärzte. Aus der Sicht des Urologen ist diese 2. Auflage ganz besonders zu begrüßen. Die Nephrologie hat in den letzten 10 Jahren eine enorme Entwicklung durchgemacht; der praktisch und klinisch tätige Urologe kann mit den neuesten Erkenntnissen nur noch beschränkt Schritt halten. Er ist daher angewiesen auf zusammenfassende Darstellungen der Nephrologie von kompetenten Fachleuten. Bereits die 1. Auflage wurde wärmstens begrüßt. Die jetzt erschienene, wesentlich ergänzte und dem neuesten Stand der Nephrologie angepasste Ausgabe erfüllt ihren Zweck in hervorragender Weise: ein Lehrbuch und, vielleicht noch besser, ein Nachschlagewerk, in welchem man rasch, übersichtlich und prägnant orientiert wird.

Die ersten Kapitel betreffen Anatomie, Histologie, Physiologie und Untersuchungstechnik. Dann folgen die Teile über die glomerulären, tubulären und interstitiellen Erkrankungen, die vaskulären Nephropathien. Schliesslich werden die Störungen der Hämodynamik, die Nierenzysten und die Grenzgebiete zur Urologie behandelt. Gerade bei diesen Grenzgebieten erkennt der Urologe, dass auch hier dem neuesten Stand Rechnung getragen wurde. Von besonderem Interesse sind die Kapitel über Therapie der akuten und chronischen Niereninsuffizienz, darunter Langzeitdialyse und Transplantation. Das Buch sollte in keiner Bibliothek fehlen, besser noch: es gehört auf den Schreibtisch jedes Fachurologen.

E. ZINGG, Bern

A. LABHART: **Klinik der inneren Sekretion**. 2., Neubearb. Aufl. Springer, Berlin 1971. XXXI+1131 pp., 408 Abb. DM.; 198.–/US\$ 57.20.

15 Jahre nach der Erstausgabe der «Klinik der inneren Sekretion», dem Standardwerk der Endokrinologie, erscheint nun eine stark erweiterte zweite Auflage, an der sich neben A. LABHART zahlreiche, fast ausschliesslich jetzige oder frühere Mitarbeiter der Medizinischen Klinik Zürich beteiligt haben. Aus dem umfangreichen Band, der die gesamte Endokrinologie umfasst, möchte ich herausgreifen, was für das urologische Spezialgebiet von besonderem Interesse ist, haben sich doch die endokrinologischen Probleme in der Urologie in ungeahntem Ausmass entwickelt, was nach immer engerem Kontakt mit dem Endokrinologen ruft. Im Vordergrund stehen in unserem Fachgebiet die Nebennierenaffektionen und deren Therapie sowie die Hodenerkrankungen. Auch Patienten mit Intersexualität und ihren Untergruppen von verschiedenen Erkrankungen müssen sich meistens früher oder später vom Urologen kontrollieren lassen, so dass es für ihn unerlässlich ist, dieses komplizierte Krankheitsbild zu kennen. Ebenso erwartet man im heutigen Zeitpunkt vom Urologen, dass ihm die Probleme des Hyperparathyreoidismus vertraut sind, da bekanntlich fast 70% der Fälle mit primärem Hyperparathyreoidismus eine renale Form aufweisen, deren Diagnose vom Urologen nicht versäumt werden darf.

Das vorliegende Buch ist dem Urologen ein ausgezeichneter Wegleiter für die modernen Untersuchungsmethoden der Endokrinologie hinsichtlich der Differentialdiagnose und für die Indikationsstellung zur einzuschlagenden Therapie. Die Autoren haben in ihren Ausführungen die gesamte Weltliteratur bis 1969 berücksichtigt, so dass das Buch als vollkommen à jour betrachtet werden kann.

Bei der laufenden Entwicklung der urologischen Grenzgebiete und anderen Spezialfächern, die mehr oder weniger eng mit der Urologie verbunden sind, ist es zu begrüßen, dass ein solch ausgezeichnetes Werk dem Urologen zur Verfügung steht, in dem er alle notwendigen Angaben über Krankheitsbilder findet, deren Kenntnis von den urologischen Chirurgen leider in zunehmendem Maße vernachlässigt wird. Wenn die Chirurgie der Nebennieren, der Parathyreoiden, der Sterilitätsfälle und der Hodenmalignome von den Urologen immer mehr den Allgemeinchirurgen überlassen wird, so ist dies ein Zeichen von mangelndem Interesse und Einsatz auf urologischer Seite, was sehr zu bedauern ist, da auf diesen endokrinologischen Problemen vielleicht einige der dankbarsten Aufgaben des Urologen beruhen.

Die moderne Präsentation des Buches von LABHART durch den Springer-Verlag hilft mit zum guten Verständnis des enormen Wissens, das darin dokumentiert ist. Wir gratulieren A. LABHART und seinen Mitarbeitern zu dem hervorragenden Werk.

G. MAYOR, Zürich

F. MOVERS: **Die Endometriose**. Enke, Stuttgart 1971. VIII+142 pp., 20 fig., 8 tab.; DM 34.-.

Wenn sich auch das Problem der Endometriose für den Urologen nicht sehr häufig stellt, so kommt es doch gelegentlich vor, dass eine Patientin mit dieser Affektion wegen Blasenlokalisation oder unklarer Abdominalbeschwerden seine Sprechstunde aufsucht. Es ist daher notwendig, dass die Urologen sich über die Endometriose ein klares Bild machen können. Nicht selten werden Patientinnen mit Uterusmyom, Ovarialtumor oder unklaren Blutungen operiert, die dann beim Eingriff als «Zufallsbefund» eine ausge dehnte Endometriose aufweisen. In der Publikation von MOVERS werden die Entstehungsmechanismen der Endometriose nach den neuesten Erkenntnissen besprochen. Möglicherweise spielen hormonelle Störungen eine gewisse Rolle bei der Auslösung dieser Erkrankung. Das Krankheitsbild der Endometriose ist noch nicht sehr bekannt. Die therapeutischen Möglichkeiten bei der Endometriose bestehen in Operation, Röntgen- und Radiumbestrahlung sowie medikamentöser Hormonbehandlung. Wichtig ist die Prophylaxe der Endometriose. Die Lokalisation dieses Leidens in der Harnblase ist selten, wobei der Befund als blutender Tumor imponiert. Es sollte in einem solchen Falle die Erkrankung differentialdiagnostisch nicht verkannt werden. Bei Unkenntnis der Endometriose, wenn sie als Blasenkarzinom behandelt wird, kann es zu schwerwiegenden Folgen kommen.

G. MAYOR, Zürich

E. BORS and A. E. COMARR: **Neurologic Urology**.

BORS ist seit Jahrzehnten durch zahlreiche Arbeiten über die neurologischen Probleme der gelähmten Blase bekannt geworden, die aus dem von ihm geleiteten Spinal Cord Injury Servic des Veterans Administration Hospital, Long Beach, Calif., einer Musterklinik für die Behandlung der Paraplegiker und anderer Erkrankungen des Rückenmarks stammen und allen Urologen, Neurologen und Neurochirurgen ein Begriff ist. Die neurologische Urologie hat sich nur in wenigen hochspezialisierten Zentren entwickelt und ist bis jetzt von der Mehrzahl der urologischen Kliniken vernachlässigt, ja ignoriert worden, sowohl aus Mangel an Interesse und Einsatz, als auch wegen ungenügender neurologischer oder neurochirurgischer Ausbildung der Ärzte. Um so mehr ist die vorliegende ausgezeichnete Monographie zu begrüßen, da sie vor allem für den Urologen bearbeitet ausgezeichnete Monographie zu begrüßen, da sie vor allem für den Urologen bearbeitet

worden ist und den jetzigen Stand der Kenntnisse in der neurologisch-urologischen Chirurgie dokumentiert, die sich nun als differenzierter Zweig der Urologie glücklicherweise durchgesetzt hat. Die Redaktion der *Urologia Internationalis* hat BORS vor einigen Jahren angefragt, ob er seine reiche Erfahrung in einer Monographie über die Problematik der gelähmten Blase veröffentlichen möchte. Der Vorschlag wurde angenommen. Es hat sich aber dann herausgestellt, dass die Materie so enorm war, dass sie in einer kurzen Monographie nicht hätte bewältigt werden können. An ihrer Stelle ist nun, in Zusammenarbeit mit COMARR, seinem intimsten Mitarbeiter vom Spinal Cord Injury Service, Long Beach, dieses Buch entstanden, dem ganz besondere Beachtung geschenkt werden sollte.

In seinem ersten Drittel werden theoretische Grundlagen der neurologischen Urologie in verschiedenen Kapiteln bis in alle Einzelheiten der Embryologie, der Physiologie der Miktion, der Neuroanatomie und Neurophysiologie besprochen, indem der genaue Mechanismus der Miktion und das genaue Zusammenspiel des parasympathisch gesteuerten Detrusors mit der somatisch gesteuerten Beckenbodenmuskulatur zur Darstellung gebracht werden. Berücksichtigt werden auch die Miktionsstörungen im Zusammenhang mit Störungen des supraspinalen Reflexes bei kortikalen Läsionen funktioneller oder organischer Natur. Es folgt die Klinik mit Eingehen auf die verschiedenen Untersuchungsmethoden und deren Gang, wobei ausser den gewöhnlichen urologischen Untersuchungsverfahren besonders die Sphinkterometrie, die Zystometrie, die Uroflowmetrie und die Elektromyographie genau erklärt werden. Selbstverständlich werden die klinischen Methoden inklusive radiologischen Untersuchungen, die wir alle kennen, nicht vernachlässigt. Am Schluss dieses Untersuchungskapitels findet man eine genaue Aufstellung der verschiedenen neurologischen Untersuchungsmethoden mit Prüfung der Reflexe. Die Klinik selbst befasst sich mit der Symptomatologie, der Diagnose, der Differentialdiagnose und der Behandlung der Miktionsstörungen, bei welchen eine neurologische Ursache in Frage kommt. Bei allen klinischen Krankheitsbildern wird man mit den theoretischen Grundlagen konfrontiert. Die gesamte klinische Darstellung vermittelt ein eindruckliches Beispiel des engen Zusammenhanges zwischen theoretischen Problemen und pathologischen Folgerungen. Ganz besondere Aufmerksamkeit wird den Richtlinien zur Behandlung der neurologischen Blase beim Paraplegiker gewidmet, wobei die Autoren aus ihrer ausserordentlich grossen, in vielen Jahren gesammelten Erfahrung schöpfen. Bei den therapeutischen Folgerungen werden die urologischen, neurologischen und neurochirurgischen Methoden angegeben unter Einschluss der elektrischen Stimulation der Blase, die neuerdings angewendet wird. Das letzte Kapitel handelt von den Komplikationen, die besonders häufig bei den gelähmten Blasen auftreten, vor allem von den Steinbildungen. Bekanntlich sind diese Komplikationen schwer zu beseitigen, wie denn überhaupt die Behandlung der neurogen entstandenen Blasenlähmungen sehr schwierig ist. Neben urethralen und vesikalen Komplikationen stehen die Anstrengungen zur Bekämpfung des vesiko-urethralen Refluxes im Vordergrund. Was die Therapie anbetrifft, kann im Rahmen dieser Besprechung unmöglich ein genauer Überblick dieses hervorragenden Werkes gegeben werden, das den Urologen sehr viel neue Kenntnisse erschliesst, aber auch zum Teil schwierig zu verstehen ist. Es führt zum Schluss über 2000 Referenzen der modernen Literatur an, die sich mit allen diesen neurologisch-urologischen Problemen befassen. Den Herren BORS und COMARR gebührt grosser Dank, dass sie uns Grundlagen und Anregung zum besseren Verständnis unserer neurologisch-urologischen Patienten verschafft haben, deren Schicksal erschreckend ist, wenn sie nicht *lege artis* behandelt werden.

G. MAYOR, Zürich
